# Supplementary material for: Identification of Gene Expression Pattern Related to Breast Cancer Survival Using Integrated TCGA Datasets and Genomic Tools
Source: Biomed Res Int. 2015 Oct 20;2015:878546. doi: 10.1155/2015/878546 (PMC4630377; doi:10.1155/2015/878546)
Supplement: Supplementary file 1 — The total 201 genes that their expression levels were significantly related to shorter overall survival in breast cancer patients were listed in two excel files. High expression with poor prognosis Low expression with poor prognosis Supplement Figure 1: The survival curves of related mitochondrial ribosome and cytosol ribosome genes expression pattern were given in Supplement Figure 1. Supplement Figure 2: Four additional breast cancer gene expression datasets that were downloaded from Oncomine were plotted in Supplement Figure 2 to support that HSPA2 plays a different role in breast cancer. Supplement Figure 3: Supplement Figure 3 gave survival curves that generated from NKI295 datasets also help us confirm the HSPA2 expression pattern in breast cancer. [file 878546.f1.zip]

Archive with 5 entries (3 files):
- 878546.f1/
- 878546.f1/Supplementary Materials/
- 878546.f1/Supplementary Materials/high expression with poor prognosis.csv
- 878546.f1/Supplementary Materials/low expression with poor prognosis.csv
- 878546.f1/Supplementary Materials/Supplement Figures.pdf
