# Supplementary material for: Identification of Gene Expression Pattern Related to Breast Cancer Survival Using Integrated TCGA Datasets and Genomic Tools
Source: Biomed Res Int. 2015 Oct 20;2015:878546. doi: 10.1155/2015/878546 (PMC4630377; doi:10.1155/2015/878546)
Supplement: Supplementary file 1 — The total 201 genes that their expression levels were significantly related to shorter overall survival in breast cancer patients were listed in two excel files. High expression with poor prognosis Low expression with poor prognosis Supplement Figure 1: The survival curves of related mitochondrial ribosome and cytosol ribosome genes expression pattern were given in Supplement Figure 1. Supplement Figure 2: Four additional breast cancer gene expression datasets that were downloaded from Oncomine were plotted in Supplement Figure 2 to support that HSPA2 plays a different role in breast cancer. Supplement Figure 3: Supplement Figure 3 gave survival curves that generated from NKI295 datasets also help us confirm the HSPA2 expression pattern in breast cancer. [file 878546.f1.zip › 878546.f1/Supplementary Materials/high expression with poor prognosis.csv]

GENE	CHISQ	P_VALUE	GROUP_ONE_NUMBER	GROUP_TWO_NUMBER	OBSERVER_ONE_NUMBER	OBSERVER_TWO_NUMBER	EXPECTED_ONE_NUMBER	EXPECTED_TWO_NUMBER
MYLK2	10.03466779	0.001536213	15	298	5	31	1.382644312	35
SQLE	8.8764185	0.002888777	80	234	16	20	8.451657989	28
CKLF	8.118871155	0.004380683	33	280	7	29	2.597469009	33
SDHA	15.40112376	8.69366E-05	21	292	5	31	1.062827305	35
PSMB1	8.779243969	0.003046775	64	250	10	26	4.298900895	32
FABP6	13.47508868	0.000241752	69	245	13	23	5.309743205	31
SLCO6A1	8.399046637	0.003754179	21	291	6	30	2.019953243	34
GOT1	9.97842548	0.001583851	99	215	18	18	9.632859995	26
BASP1	8.039750329	0.004576184	22	292	5	31	1.561833144	34
AMZ2	8.05006434	0.004550204	190	124	27	9	18.69294973	17
PCMT1	12.78314396	0.000349757	47	267	11	25	4.157337369	32
C8orf33	10.65150804	0.001099812	180	134	28	8	18.2896755	18
COQ10A	20.51573959	5.9143E-06	33	281	9	27	2.376674519	34
SYNJ2	20.56063097	5.7772E-06	47	267	13	23	4.257730408	32
LRP11	16.50895761	4.84208E-05	131	184	20	16	9.565699243	26
RAN	8.18801123	0.004216813	24	289	6	30	2.057234546	34
SLC25A46	14.85277508	0.000116237	23	291	5	31	1.085047986	35
PTGES3	20.23233266	6.8584E-06	26	287	9	27	2.363653162	34
LRRC10	10.08928469	0.00149134	81	232	17	19	8.843800511	27
KRR1	7.986562021	0.004712582	183	131	26	10	17.76584458	18
SLC7A6	23.44116114	1.2879E-06	28	285	8	28	1.795688308	34
RGS9BP	8.43353458	0.003683636	151	164	25	11	16.3520525	20
NQO1	16.38429707	5.17119E-05	79	234	14	22	5.442446329	31
UQCRB	8.193918119	0.004203105	173	142	28	8	19.46728851	17
GIP	8.441795989	0.003666939	124	190	23	13	14.49027414	22
CAMSAP1	10.94466673	0.000938734	97	216	19	17	10.10058797	26
COX8A	12.6758832	0.000370402	79	234	18	18	8.823942437	27
DDX31	10.5804061	0.001142926	38	275	8	28	2.810384352	33
NUP85	9.910384792	0.001643488	65	249	14	22	6.70603921	29
SPATS2	8.349657617	0.0038576	50	263	12	24	5.698856982	30
KCNJ13	7.976216327	0.00473959	42	271	8	28	3.220626515	33
GMPR	10.40388562	0.001257504	77	237	18	18	9.498579687	27
PRDX1	11.14327338	0.000843369	143	171	22	14	12.60523148	23
PRDX5	10.78169534	0.001025088	135	181	24	12	14.36871001	22
KIAA0195	13.22723275	0.000275911	79	236	17	19	8.031966503	28
PSMD12	14.81981173	0.000118286	90	223	17	19	7.713208221	28
VPS33A	9.044267064	0.002635199	61	252	12	24	5.58090363	30
MRE11A	11.30411127	0.000773357	51	262	10	26	3.845571583	32
SLC25A5	13.18283041	0.000282526	28	285	10	26	3.537491462	32
MRPS7	10.12519989	0.001462558	128	186	20	16	11.38956029	25
TXNRD1	19.67685281	9.1705E-06	19	295	5	31	0.888034856	35
MRM1	9.117071566	0.00253235	57	256	11	25	4.857753699	31
GRPEL1	12.32565138	0.000446776	62	252	12	24	4.93114505	31
ZNF431	8.901457659	0.002849431	33	280	8	28	3.059462485	33
SLC4A1AP	9.271665215	0.00232726	113	202	22	14	13.21103971	23
PSMA6	9.046342387	0.002632209	79	234	14	22	6.959236405	29
ZNF57	9.304466285	0.002285959	101	213	18	18	9.871820318	26
C12orf29	13.99087933	0.0001837	28	284	8	28	2.429065907	34
ETFA	24.74890034	6.531E-07	11	304	5	31	0.751233159	35
ATP5E	8.845453167	0.002938199	182	131	27	9	18.17954248	18
RBM18	16.08024354	6.07141E-05	66	247	17	19	7.334532706	29
LOC729603	8.502982711	0.003545648	25	290	5	31	1.509641383	34
ARPC5L	9.726074965	0.00181672	112	202	21	15	12.16832709	24
DNAJC11	8.43580678	0.003679036	47	265	11	25	5.027461006	31
ATP5G3	16.19281401	5.72107E-05	38	275	11	25	3.689799439	32
PSMD14	23.62829514	1.1686E-06	34	278	10	26	2.546979174	33
CCNT1	7.968368705	0.004760182	168	145	26	10	17.57460603	18
REXO2	8.05802222	0.004530261	18	295	5	31	1.553483105	34
REPS1	19.0120947	1.29893E-05	77	236	18	18	7.471162913	29
TTF1	11.80433187	0.000590931	31	281	9	27	3.171169011	33
HSPE1	11.01706922	0.000902767	41	272	11	25	4.452101826	32
CBX5	9.810292437	0.001735379	32	281	6	30	1.890255326	34
DCTN6	10.79123416	0.001019819	77	238	14	22	6.479115741	30
PTS	8.071060313	0.004497779	66	247	11	25	5.099676354	31
ZXDC	7.953763642	0.004798748	179	136	26	10	17.60931886	18
CCT7	10.07729192	0.001501078	14	299	5	31	1.370996949	35
ZBTB11	8.798653718	0.003014529	76	239	16	20	8.476238785	28
C2orf47	9.374958565	0.002199697	121	193	21	15	12.30681762	24
PTAR1	10.06459145	0.001511461	27	288	7	29	2.331017147	34
GCN1L1	16.01210026	6.29389E-05	42	271	9	27	2.738939513	33
COX5B	10.3359347	0.00130465	89	225	19	17	10.29536277	26
TBP	20.43850984	6.1578E-06	28	285	9	27	2.339069008	34
AS3MT	8.67198048	0.003231398	43	271	10	26	4.289633154	32
TRAPPC4	11.03496127	0.000894095	69	245	15	21	7.086341543	29
MAP1LC3B	9.097031696	0.002560247	63	253	12	24	5.507024804	30
HIBCH	9.658962026	0.001884301	99	216	18	18	9.736034469	26
MRPS25	21.43308744	3.6639E-06	27	285	7	29	1.51100513	34
RPAP3	8.503395991	0.003544843	49	264	10	26	4.328666447	32
CCT2	12.52507275	0.000401527	29	284	6	30	1.630860311	34
DCUN1D4	8.876959963	0.00288792	21	292	7	29	2.500504609	33
HSPA9	7.908551625	0.004920165	158	158	23	13	14.79677042	21
C16orf80	12.78533784	0.000349347	32	282	10	26	3.586453792	32
MRPS23	8.407395707	0.003736976	61	252	9	27	3.827813173	32
MBD5	13.51901	0.000236159	47	266	16	20	7.219482166	29
TRAPPC2L	8.471078575	0.003608374	59	254	13	23	6.370071496	30
FAM60A	12.01036656	0.000529055	20	293	5	31	1.24760705	35
PPAT	8.517188004	0.003518077	41	272	10	26	4.32711459	32
CAND1	8.601977702	0.003357982	150	165	22	14	13.59151457	22
MRPL13	8.936672107	0.002795015	133	181	22	14	13.37107194	23
PTPDC1	10.27657697	0.001347297	56	257	12	24	5.271085848	31
NOL3	11.57039365	0.000670102	64	249	15	21	6.971876074	29
SURF4	11.23785353	0.000801458	97	217	18	18	9.232073772	27
SDHD	21.05018202	4.4741E-06	31	285	8	28	1.899514409	34
XRCC6BP1	8.063003035	0.004517824	31	282	10	26	4.435469075	32
CCDC83	12.13659544	0.00049442	29	284	8	28	2.608462531	33
PSCA	9.06806908	0.002601116	125	189	23	13	14.19383069	22
GABARAPL2	13.13231387	0.000290246	88	228	14	22	6.066930135	30
HIATL1	8.724837799	0.00313904	139	175	25	11	16.24672129	20
PRH2	10.09277524	0.001488518	103	210	22	14	12.89621914	23
PLAC4	10.00607423	0.001560248	17	296	5	31	1.382206345	35
RAB3A	8.2655871	0.004040359	89	224	17	19	9.42508004	27
CISD2	9.595082593	0.001950992	51	261	10	26	4.152077975	32
RPS26	20.50763854	5.9394E-06	14	299	7	29	1.538423383	34
MRPL18	26.27765596	2.957E-07	79	235	20	16	7.559343832	28
LRRC39	14.23607607	0.000161249	38	274	10	26	3.426219955	33
H3F3B	7.959218058	0.004784308	170	145	26	10	17.63507885	18
MOSPD1	13.37268733	0.000255315	27	286	8	28	2.471127595	34
