# Supplementary material for: Identification of Gene Expression Pattern Related to Breast Cancer Survival Using Integrated TCGA Datasets and Genomic Tools
Source: Biomed Res Int. 2015 Oct 20;2015:878546. doi: 10.1155/2015/878546 (PMC4630377; doi:10.1155/2015/878546)
Supplement: Supplementary file 1 — The total 201 genes that their expression levels were significantly related to shorter overall survival in breast cancer patients were listed in two excel files. High expression with poor prognosis Low expression with poor prognosis Supplement Figure 1: The survival curves of related mitochondrial ribosome and cytosol ribosome genes expression pattern were given in Supplement Figure 1. Supplement Figure 2: Four additional breast cancer gene expression datasets that were downloaded from Oncomine were plotted in Supplement Figure 2 to support that HSPA2 plays a different role in breast cancer. Supplement Figure 3: Supplement Figure 3 gave survival curves that generated from NKI295 datasets also help us confirm the HSPA2 expression pattern in breast cancer. [file 878546.f1.zip › 878546.f1/Supplementary Materials/low expression with poor prognosis.csv]

GENE	CHISQ	P_VALUE	GROUP_ONE_NUMBER	GROUP_TWO_NUMBER	OBSERVER_ONE_NUMBER	OBSERVER_TWO_NUMBER	EXPECTED_ONE_NUMBER	EXPECTED_TWO_NUMBER
WDR16	8.840413938	0.002946323	233	81	22	14	28.9951232	7
SERPINA3	9.405573357	0.002163269	243	73	20	16	27.66509831	8
PLSCR3	8.40657308	0.003738667	232	82	22	14	28.86577257	7
OLFM2	10.76499492	0.001034379	289	24	29	7	33.75234599	2
MDFIC	7.889713817	0.004971673	203	110	13	23	21.22043782	15
STXBP3	14.9048245	0.000113073	229	85	18	18	27.72955096	8
RAP1GDS1	8.881355928	0.002880975	270	44	28	8	32.94403331	3
LAMB2	7.948647418	0.004812333	279	33	27	9	32.19232969	4
MGAM	9.348007947	0.00223228	230	84	20	16	27.65984405	8
RPL3	10.50010175	0.00119368	222	91	21	15	28.68418625	7
RASGEF1A	11.47077182	0.000706993	211	104	19	17	27.50100533	8
GLTSCR2	8.141875994	0.004325451	213	100	17	19	24.89318156	11
SPATA4	8.786278123	0.003035048	232	84	19	17	26.76075046	9
IMPACT	8.409604973	0.003732438	287	25	30	6	33.97443496	2
CYR61	9.682592302	0.00186022	208	105	17	19	25.40808162	11
KRT7	8.290459815	0.00398539	257	56	24	12	30.25479175	6
GLB1L	10.83003791	0.000998666	258	55	25	11	31.43265412	5
H6PD	10.45964755	0.001220106	222	91	17	19	25.73217748	10
KRT26	8.323600486	0.003913328	200	114	17	19	24.92607851	11
PLAT	11.66415965	0.000637157	199	116	15	21	24.41098724	12
RPS9	10.64053318	0.001106358	252	61	24	12	30.77181234	5
LCE2D	9.079688567	0.002584641	295	18	31	5	34.5430205	1
IFITM2	13.76980246	0.000206631	281	32	28	8	33.56227503	2
ZNF416	14.58939444	0.000133665	288	27	30	6	34.5182295	1
NEK4	11.2984554	0.000775716	225	90	18	18	26.7259086	9
PTGES	11.05187653	0.000885975	261	53	26	10	32.12791092	4
OR4Q3	10.56830297	0.001150433	243	70	22	14	29.4854505	7
CD248	21.11068794	0.000004335	306	6	31	5	35.1546308	1
IRS4	8.800213062	0.003011954	225	88	20	16	27.51261493	8
ARID5B	16.30367862	5.40E-05	262	51	25	11	32.29238716	4
LMNA	7.980172829	0.004729243	191	122	14	22	22.14068236	14
MPDZ	14.56111592	0.000135686	182	131	13	23	23.73504605	12
C11orf16	9.734174528	0.001808732	291	23	29	7	33.62581665	2
CYP2C8	11.76419787	0.000603809	205	108	17	19	26.13133445	10
PLEKHG3	16.34207078	5.29E-05	293	20	30	6	34.61509671	1
IFITM3	12.81237452	0.000344334	278	35	28	8	33.46389595	3
TTC17	11.05087617	0.000886453	253	60	22	14	29.60417705	6
ATF6	10.68900275	0.001077743	290	22	30	6	34.21778764	2
SPAG11B	10.74186269	0.001047389	259	54	26	10	32.06857661	4
SUSD3	14.04836723	0.000178169	265	48	24	12	31.45097292	5
ZNF71	13.46388015	0.0002432	296	17	31	5	34.84951009	1
TAAR2	8.656354072	0.003259228	270	44	26	10	31.69634309	4
TRIM21	18.72643186	1.51E-05	294	19	30	6	34.74151211	1
GBGT1	9.29962944	0.002292002	165	149	9	27	18.12491137	18
NXNL2	8.665550523	0.00324282	122	194	7	29	15.67298906	20
CNFN	20.77192002	5.17E-06	300	13	31	5	35.14411476	1
KLHL25	8.044027173	0.004565393	269	45	30	6	33.8959092	2
COL22A1	9.500799616	0.002053824	293	20	31	5	34.56705433	1
ADSS	10.5418865	0.001166992	251	64	22	14	29.42818972	7
LRRC29	9.626516147	0.001917881	265	47	24	12	30.6208169	5
TES	9.16267065	0.002470018	264	50	25	11	31.11024684	5
C1orf168	10.79604119	0.001017174	176	139	11	25	20.68032834	15
HPGD	8.533325991	0.003487019	147	168	10	26	18.73918098	17
NFATC1	9.567847997	0.001980148	248	65	22	14	29.2315775	7
NEK10	11.97854031	0.000538167	213	102	17	19	26.2054779	10
SULF2	8.833734474	0.002957126	163	151	14	22	22.44920887	14
HSPA2	12.11282699	0.000500762	281	33	28	8	33.37521542	3
COMMD9	13.79976067	0.000203362	273	41	25	11	31.99509136	4
DYRK3	9.184488791	0.002440747	197	118	18	18	25.9192094	10
TPD52L3	9.167033443	0.002464137	252	62	24	12	30.5136565	5
RPS27	10.9421575	0.000940007	261	52	24	12	30.86680143	5
TNFRSF14	8.209998329	0.004166019	143	172	9	27	17.56721961	18
OTOS	12.70052624	0.000365553	273	42	27	9	32.90884436	3
BET1L	9.488114955	0.002068072	278	35	28	8	33.02954661	3
TAS2R9	9.787215218	0.001757294	250	64	26	10	31.86790242	4
UCN2	11.29878305	0.000775579	282	33	28	8	33.28076912	3
MMP19	16.99016377	0.000037574	300	12	31	5	35.01523613	1
GUCA2B	10.90743095	0.000957793	297	16	30	6	34.24497479	2
SPATA2L	11.72540454	0.000616527	244	69	24	12	30.9660234	5
LZTS2	12.48619994	0.000409969	241	72	20	16	28.56823149	7
RCL1	12.48957408	0.00040923	129	186	8	28	18.48551084	18
PDLIM5	10.32221797	0.001314382	296	17	31	5	34.64699153	1
ATXN3	7.928774639	0.004865474	167	148	13	23	21.23379373	15
MBOAT1	8.032316777	0.004595003	272	41	26	10	31.56755988	4
PRM2	8.961679274	0.002757014	301	13	31	5	34.52900245	1
DGKZ	10.11203672	0.001473041	244	71	23	13	30.04774806	6
DYDC2	9.007793811	0.002688307	209	106	17	19	25.17350918	11
HOXD9	7.902728562	0.004936028	301	11	31	5	34.42733485	2
ACTN1	8.623797798	0.003317994	268	47	26	10	31.66028519	4
IL17B	9.409545485	0.002158587	102	213	6	30	14.98436794	21
C12orf50	12.73661261	0.000358567	188	126	14	22	23.91301721	12
POLI	9.501172385	0.002053407	188	127	15	21	23.71155578	12
ACTB	10.92884536	0.000946785	267	46	27	9	32.65823314	3
NACAD	8.202191338	0.004183983	138	176	8	28	16.51279718	19
BTBD7	8.217744643	0.004148273	293	20	30	6	33.96407132	2
MGMT	13.53892575	0.000233666	289	24	31	5	34.84395358	1
PML	17.74455326	0.000025264	275	38	26	10	32.93819205	3
BAG1	8.10843377	0.004405978	220	93	21	15	27.98308479	8
TPT1	8.616384448	0.003331525	271	42	25	11	31.05404279	5
STOX1	8.359351107	0.003837076	230	83	22	14	28.82027144	7
POU3F3	8.773376367	0.003056591	289	25	29	7	33.48480435	3
FLJ44635	9.977214759	0.001584892	205	108	18	18	26.30011416	10
SERPINH1	7.892895337	0.004962935	135	180	8	28	16.33316437	20
RPL13A	13.44252961	0.000245984	261	53	27	9	32.95872743	3
